# Supplementary material for: Mycobacterium tuberculosis Complex Lipid Virulence Factors Preserved in the 17,000-Year-Old Skeleton of an Extinct Bison, Bison antiquus
Source: PLoS One. 2012 Jul 30;7(7):e41923. doi: 10.1371/journal.pone.0041923 (PMC3408397; doi:10.1371/journal.pone.0041923)
Supplement: Figure S2 — Solvent system for the purification of pentafluorobenzyl (PFB) mycocerosates on C18 reverse phase cartridges. (DOC) [file pone.0041923.s002.doc]

**Figure S2** Solvent system for the purification of pentafluorobenzyl (PFB) mycocerosates on C18 reverse phase cartridges.

Alltech 205250 (500mg) C18 reverse phase cartridges were used. Each fraction (6 ml) was evaporated to dryness and fractions 6 and 7 were combined and analysed by NICI-GCMS.

| Fraction | Water | Methanol | Toluene |
| --- | --- | --- | --- |
| 1 | 1.8 | 4.2 | 0.0 |
| 2 | 1.1 | 4.9 | 0.0 |
| 3 | 1.0 | 5.0 | 0.0 |
| 4 | 0.9 | 5.1 | 0.0 |
| 5 | 0.8 | 5.2 | 0.0 |
| 6 | 0.0 | 6.0 | 0.0 |
| 7 | 0.0 | 6.0 | 0.0 |
| 8 | 0.0 | 4.8 | 1.2 |
